# Supplementary material for: Characterization of Brevibacillus laterosporus Cas9 (BlatCas9) for Mammalian Genome Editing
Source: Front Cell Dev Biol. 2020 Oct 19;8:583164. doi: 10.3389/fcell.2020.583164 (PMC7604293; doi:10.3389/fcell.2020.583164)
Supplement: Supplementary file 3 [file Table_2.XLSX]

## Sheet: Sheet1
Table S2. Primers used in this study
Name	Sequence	Description
ITIH5_F	ACC GGCTCGGAGATCATCATTGCG	Oligonucleotide pairs for construction of gRNA expression plasmid on Blat_tracr-gRNA vector
ITIH5_R	AGC CGCAATGATGATCTCCGAGCC	Oligonucleotide pairs for construction of gRNA expression plasmid on Blat_tracr-gRNA vector
ITIH5_F2	ACC GACGGCTCGGAGATCATCATT	Oligonucleotide pairs for construction of gRNA expression plasmid on Blat_tracr-gRNA vector
ITIH5_R2	AGC AATGATGATCTCCGAGCCGTC	Oligonucleotide pairs for construction of gRNA expression plasmid on Blat_tracr-gRNA vector
TS2_F	ACC GAGAGTAGAGGCGGCCACGAC	Oligonucleotide pairs for construction of gRNA expression plasmid on Blat_tracr-gRNA vector
TS2_R	AGC GTCGTGGCCGCCTCTACTCTC	Oligonucleotide pairs for construction of gRNA expression plasmid on Blat_tracr-gRNA vector
APANC15_sg1_F	ACC GTGCCCTTCCCTGTATCTCAG	Oligonucleotide pairs for construction of gRNA expression plasmid on Blat_tracr-gRNA vector
APANC15_sg1_R	AGC CTGAGATACAGGGAAGGGCAC	Oligonucleotide pairs for construction of gRNA expression plasmid on Blat_tracr-gRNA vector
APANC15_sg2_F	ACC GGCAGCGGCTGGCCCTGGGT	Oligonucleotide pairs for construction of gRNA expression plasmid on Blat_tracr-gRNA vector
APANC15_sg2_R	AGC ACCCAGGGCCAGCCGCTGCC	Oligonucleotide pairs for construction of gRNA expression plasmid on Blat_tracr-gRNA vector
FJX1_sg2_F	ACC GTGGTGAGCCTGACACGCTGG	Oligonucleotide pairs for construction of gRNA expression plasmid on Blat_tracr-gRNA vector
FJX1_sg2_R	AGC CCAGCGTGTCAGGCTCACCAC	Oligonucleotide pairs for construction of gRNA expression plasmid on Blat_tracr-gRNA vector
FJX1_sg3_F	ACC GGTCGAAGTTGGCCGTCAGG	Oligonucleotide pairs for construction of gRNA expression plasmid on Blat_tracr-gRNA vector
FJX1_sg3_R	AGC CCTGACGGCCAACTTCGACC	Oligonucleotide pairs for construction of gRNA expression plasmid on Blat_tracr-gRNA vector
Vsg2_F	ACC GCTGGTCAGGAATGATCTGGA	Oligonucleotide pairs for construction of gRNA expression plasmid on Blat_tracr-gRNA vector
Vsg2_R	AGC TCCAGATCATTCCTGACCAGC	Oligonucleotide pairs for construction of gRNA expression plasmid on Blat_tracr-gRNA vector
Vsg5_F	ACC GACCCAGGGAGGCTATGGGA	Oligonucleotide pairs for construction of gRNA expression plasmid on Blat_tracr-gRNA vector
Vsg5_R	AGC TCCCATAGCCTCCCTGGGTC	Oligonucleotide pairs for construction of gRNA expression plasmid on Blat_tracr-gRNA vector
Vsg6_F	ACC GCCCCAACAGAGGTAGCCAAG	Oligonucleotide pairs for construction of gRNA expression plasmid on Blat_tracr-gRNA vector
Vsg6_R	AGC CTTGGCTACCTCTGTTGGGGC	Oligonucleotide pairs for construction of gRNA expression plasmid on Blat_tracr-gRNA vector
Blat-AAVS1-sg1-F	ACC GCACCCCACAGTGGGGCCACTA	Oligonucleotide pairs for construction of gRNA expression plasmid on Blat_tracr-gRNA vector
Blat-AAVS1-sg1-R	AGC TAGTGGCCCCACTGTGGGGTGC	Oligonucleotide pairs for construction of gRNA expression plasmid on Blat_tracr-gRNA vector
Blat-AAVS1-sg2-F	ACC GTCCCCTCCACCCCACAGTGGG	Oligonucleotide pairs for construction of gRNA expression plasmid on Blat_tracr-gRNA vector
Blat-AAVS1-sg2-R	AGC CCCACTGTGGGGTGGAGGGGAC	Oligonucleotide pairs for construction of gRNA expression plasmid on Blat_tracr-gRNA vector
Blat-AAVS1-sg3-F	ACC GACCAATCCTGTCCCTAGTGGC	Oligonucleotide pairs for construction of gRNA expression plasmid on Blat_tracr-gRNA vector
Blat-AAVS1-sg3-R	AGC GCCACTAGGGACAGGATTGGTC	Oligonucleotide pairs for construction of gRNA expression plasmid on Blat_tracr-gRNA vector
Blat-AAVS1-sg4-F	ACC GGGGCCACTAGGGACAGGATTG	Oligonucleotide pairs for construction of gRNA expression plasmid on Blat_tracr-gRNA vector
Blat-AAVS1-sg4-R	AGC CAATCCTGTCCCTAGTGGCCCC	Oligonucleotide pairs for construction of gRNA expression plasmid on Blat_tracr-gRNA vector
ANAPC15_T7_F	TTCGCGTTTAGCAACCCTAT	T7E1 test primer
ANAPC15_T7_R	AGCATATGCAAGCAGGGTTC	T7E1 test primer
HGH1_T7_F	GCGCTAGCCAACCTCAGTC	T7E1 test primer
HGH1_T7_R	CAAAAAGGGGAGAATGTCCA	T7E1 test primer
HGH1_sg2_T7_F	GCTGCTCTCCAACCTCAGC	T7E1 test primer
HGH1_sg2_T7_R	CACTAGCCACTCACGTTCCA	T7E1 test primer
FJX1_T7_F	ATCAACCCGGAGCAGATTC	T7E1 test primer
FJX1_T7_R	CCTCATTGTCCAGAAAGACCA	T7E1 test primer
VEGFA_T7_F	TCTCCCTACCCATTGCAGAC	T7E1 test primer
VEGFA_T7_R	CAAGCCTCTGAAAATGACCA	T7E1 test primer
V6_17_F	ACC G CAACAGAGGTAGCCAAG	Oligonucleotide pairs for construction of gRNA expression plasmid on Blat_tracr-gRNA vector
V6_17_R	AGC CTTGGCTACCTCTGTTG C	Oligonucleotide pairs for construction of gRNA expression plasmid on Blat_tracr-gRNA vector
V6_18_F	ACC G CCAACAGAGGTAGCCAAG	Oligonucleotide pairs for construction of gRNA expression plasmid on Blat_tracr-gRNA vector
V6_18_R	AGC CTTGGCTACCTCTGTTGG C	Oligonucleotide pairs for construction of gRNA expression plasmid on Blat_tracr-gRNA vector
V6_19_F	ACC G CCCAACAGAGGTAGCCAAG	Oligonucleotide pairs for construction of gRNA expression plasmid on Blat_tracr-gRNA vector
V6_19_R	AGC CTTGGCTACCTCTGTTGGG C	Oligonucleotide pairs for construction of gRNA expression plasmid on Blat_tracr-gRNA vector
V6_21_F	ACC G CCCCCAACAGAGGTAGCCAAG	Oligonucleotide pairs for construction of gRNA expression plasmid on Blat_tracr-gRNA vector
V6_21_R	AGC CTTGGCTACCTCTGTTGGGGG C	Oligonucleotide pairs for construction of gRNA expression plasmid on Blat_tracr-gRNA vector
V6_22_F	ACC G GCCCCCAACAGAGGTAGCCAAG	Oligonucleotide pairs for construction of gRNA expression plasmid on Blat_tracr-gRNA vector
V6_22_R	AGC CTTGGCTACCTCTGTTGGGGGC C	Oligonucleotide pairs for construction of gRNA expression plasmid on Blat_tracr-gRNA vector
V6_23_F	ACC G AGCCCCCAACAGAGGTAGCCAAG	Oligonucleotide pairs for construction of gRNA expression plasmid on Blat_tracr-gRNA vector
V6_23_R	AGC CTTGGCTACCTCTGTTGGGGGCT C	Oligonucleotide pairs for construction of gRNA expression plasmid on Blat_tracr-gRNA vector
V6_24_F	ACC G GAGCCCCCAACAGAGGTAGCCAAG	Oligonucleotide pairs for construction of gRNA expression plasmid on Blat_tracr-gRNA vector
V6_24_R	AGC CTTGGCTACCTCTGTTGGGGGCTC C	Oligonucleotide pairs for construction of gRNA expression plasmid on Blat_tracr-gRNA vector
V6_M1_F	ACC GTCCCCCCAACAGAGGTAGCCAAG	Oligonucleotide pairs for construction of gRNA expression plasmid on Blat_tracr-gRNA vector
V6_M1_R	AGC CTTGGCTACCTCTGTTGGGGGGAC	Oligonucleotide pairs for construction of gRNA expression plasmid on Blat_tracr-gRNA vector
V6_M3_F	ACC GAGGGCCCAACAGAGGTAGCCAAG	Oligonucleotide pairs for construction of gRNA expression plasmid on Blat_tracr-gRNA vector
V6_M3_R	AGC CTTGGCTACCTCTGTTGGGCCCTC	Oligonucleotide pairs for construction of gRNA expression plasmid on Blat_tracr-gRNA vector
V6_M5_F	ACC GAGCCGGCAACAGAGGTAGCCAAG	Oligonucleotide pairs for construction of gRNA expression plasmid on Blat_tracr-gRNA vector
V6_M5_R	AGC CTTGGCTACCTCTGTTGCCGGCTC	Oligonucleotide pairs for construction of gRNA expression plasmid on Blat_tracr-gRNA vector
V6_M7_F	ACC GAGCCCCGTACAGAGGTAGCCAAG	Oligonucleotide pairs for construction of gRNA expression plasmid on Blat_tracr-gRNA vector
V6_M7_R	AGC CTTGGCTACCTCTGTACGGGGCTC	Oligonucleotide pairs for construction of gRNA expression plasmid on Blat_tracr-gRNA vector
V6_M9_F	ACC GAGCCCCCATGAGAGGTAGCCAAG	Oligonucleotide pairs for construction of gRNA expression plasmid on Blat_tracr-gRNA vector
V6_M9_R	AGC CTTGGCTACCTCTCATGGGGGCTC	Oligonucleotide pairs for construction of gRNA expression plasmid on Blat_tracr-gRNA vector
V6_M11_F	ACC GAGCCCCCAACTCAGGTAGCCAAG	Oligonucleotide pairs for construction of gRNA expression plasmid on Blat_tracr-gRNA vector
V6_M11_R	AGC CTTGGCTACCTGAGTTGGGGGCTC	Oligonucleotide pairs for construction of gRNA expression plasmid on Blat_tracr-gRNA vector
V6_M13_F	ACC GAGCCCCCAACAGTCGTAGCCAAG	Oligonucleotide pairs for construction of gRNA expression plasmid on Blat_tracr-gRNA vector
V6_M13_R	AGC CTTGGCTACGACTGTTGGGGGCTC	Oligonucleotide pairs for construction of gRNA expression plasmid on Blat_tracr-gRNA vector
V6_M15_F	ACC GAGCCCCCAACAGAGCAAGCCAAG	Oligonucleotide pairs for construction of gRNA expression plasmid on Blat_tracr-gRNA vector
V6_M15_R	AGC CTTGGCTTGCTCTGTTGGGGGCTC	Oligonucleotide pairs for construction of gRNA expression plasmid on Blat_tracr-gRNA vector
V6_M17_F	ACC GAGCCCCCAACAGAGGTTCCCAAG	Oligonucleotide pairs for construction of gRNA expression plasmid on Blat_tracr-gRNA vector
V6_M17_R	AGC CTTGGGAACCTCTGTTGGGGGCTC	Oligonucleotide pairs for construction of gRNA expression plasmid on Blat_tracr-gRNA vector
V6_M19_F	ACC GAGCCCCCAACAGAGGTAGGGAAG	Oligonucleotide pairs for construction of gRNA expression plasmid on Blat_tracr-gRNA vector
V6_M19_R	AGC CTTCCCTACCTCTGTTGGGGGCTC	Oligonucleotide pairs for construction of gRNA expression plasmid on Blat_tracr-gRNA vector
V6_M21_F	ACC GAGCCCCCAACAGAGGTAGCCATC	Oligonucleotide pairs for construction of gRNA expression plasmid on Blat_tracr-gRNA vector
V6_M21_R	AGC GATGGCTACCTCTGTTGGGGGCTC	Oligonucleotide pairs for construction of gRNA expression plasmid on Blat_tracr-gRNA vector
APANC15_sg2_F	ACC GGCAGCGGCTGGCCCTGGGT	Oligonucleotide pairs for construction of gRNA expression plasmid on Blat_tracr-gRNA vector
APANC15_sg2_R	AGC ACCCAGGGCCAGCCGCTGCC	Oligonucleotide pairs for construction of gRNA expression plasmid on Blat_tracr-gRNA vector
ECC_A2_F	CCG GGCAGCGGCTGGCCCTGGGT	Oligonucleotide pairs for construction of gRNA expression plasmid on ECC vector
ECC_A2_R	AAC ACCCAGGGCCAGCCGCTGCC	Oligonucleotide pairs for construction of gRNA expression plasmid on ECC vector
P5_index_F	AATGATACGGCGACCACCGAGATCTACACTGAACCTTACACTCTTTCCCTACACGAC	Primers for amplification of Guide-seq genome
Nuclease_off_+_GSP1	GGATCTCGACGCTCTCCCTATACCGTTATTAACATATGACA	Primers for amplification of Guide-seq genome
Nuclease_off_-_GSP1	GGATCTCGACGCTCTCCCTGTTTAATTGAGTTGTCATATGTTAATAAC	Primers for amplification of Guide-seq genome
P5_2	AATGATACGGCGACCACCGAGATCTACAC	Primers for amplification of Guide-seq genome
Nuclease_off_+_GSP2	CAAGCAGAAGACGGCATACGAGATCTAGTACGGTGACTGGAGTTCAGACGTGTGCTCTTCCGATCTGAGTTGTCATATGTTAATAACGG	Primers for amplification of Guide-seq genome
Nuclease_off_-_GSP2	CAAGCAGAAGACGGCATACGAGATCTAGTACGGTGACTGGAGTCCTCTCTATGGGCAGTCGGTGATTTGAGTTGTCATATGTTAATAACGGTA	Primers for amplification of Guide-seq genome
